# Supplementary material for: Do glycemic marker levels vary by race? Differing results from a cross-sectional analysis of individuals with and without diagnosed diabetes
Source: PubMed Central journal article supplement — BMJ Open Diabetes Res Care. 2016 Jun 10;4(1):e000213. doi: 10.1136/bmjdrc-2016-000213 (PMC4908883; doi:10.1136/bmjdrc-2016-000213), 2016-06-10

## Online Supplement

# **Do Glycemic Marker Levels Vary by Race? Differing Results from a Cross-sectional Analysis of Individuals with and without Diagnosed Diabetes**

April P. Carson, PhD

Paul Muntner, PhD

Elizabeth Selvin, PhD, MPH

Mercedes R. Carnethon, PhD

Xuelin Li, PhD

Myron D. Gross, PhD

W. Timothy Garvey, MD

Cora E. Lewis, MD, MSPH

Table S1. Spearman correlations of glycemic markers among individuals with and without diagnosed diabetes, the CARDIA Study 2005-2006

| <b>Diagnosed Diabetes (N=147)</b> |                        |                |                         |                     |                            |  |
|-----------------------------------|------------------------|----------------|-------------------------|---------------------|----------------------------|--|
| <b>Glycemic markers</b>           | <b>Fasting glucose</b> | <b>A1c</b>     | <b>Glycated albumin</b> | <b>Fructosamine</b> | <b>1,5-Anhydroglucitol</b> |  |
| Fasting glucose (mg/dL)           | 1.00                   | 0.76 (<.0001)  | 0.77 (<.0001)           | 0.78 (<.0001)       | -0.59 (<.0001)             |  |
| A1c (%)                           | 0.76 (<.0001)          | 1.00           | 0.84 (<.0001)           | 0.80 (<.0001)       | -0.76 (<.0001)             |  |
| Glycated albumin (%)              | 0.77 (<.0001)          | 0.84 (<.0001)  | 1.00                    | 0.94 (<.0001)       | -0.73 (<.0001)             |  |
| Fructosamine (μmol/L)             | 0.78 (<.0001)          | 0.80 (<.0001)  | 0.94 (<.0001)           | 1.00                | -0.72 (<.0001)             |  |
| 1,5-anhydroglucitol (μg/mL)       | -0.59 (<.0001)         | -0.76 (<.0001) | -0.73 (<.0001)          | -0.72 (<.0001)      | 1.00                       |  |

  

| <b>No Diagnosed Diabetes (N=2545)</b> |                        |               |                         |                     |                            |                                      |
|---------------------------------------|------------------------|---------------|-------------------------|---------------------|----------------------------|--------------------------------------|
| <b>Glycemic markers</b>               | <b>Fasting glucose</b> | <b>A1c</b>    | <b>Glycated albumin</b> | <b>Fructosamine</b> | <b>1,5-Anhydroglucitol</b> | <b>2-hour postchallenge glucose*</b> |
| Fasting glucose (mg/dL)               | 1.00                   | 0.37 (<.0001) | 0.04 (0.0729)           | 0.09 (<.0001)       | 0.02 (0.3805)              | 0.31 (<.0001)                        |
| A1c (%)                               | 0.37 (<.0001)          | 1.00          | 0.15 (<.0001)           | 0.06 (0.0053)       | 0.05 (0.0128)              | 0.26 (<.0001)                        |
| Glycated albumin (%)                  | 0.04 (0.0729)          | 0.15 (<.0001) | 1.00                    | 0.64 (<.0001)       | -0.21 (<.0001)             | 0.06 (0.0042)                        |
| Fructosamine (μmol/L)                 | 0.09 (<.0001)          | 0.06 (0.0053) | 0.64 (<.0001)           | 1.00                | -0.10 (<.0001)             | 0.05 (0.0118)                        |
| 1,5-anhydroglucitol (μg/mL)           | 0.02 (0.3805)          | 0.05 (0.0128) | -0.21 (<.0001)          | -0.10 (<.0001)      | 1.00                       | -0.08 (0.0002)                       |
| 2-hour postchallenge glucose* (mg/dL) | 0.31 (<.0001)          | 0.26 (<.0001) | 0.06 (0.0042)           | 0.05 (0.0118)       | -0.08 (0.0002)             | 1.00                                 |

\*N=2164

Table S2. Histogram of fasting glucose and scatterplots of fasting glucose with A1c, glycated albumin (GA), fructosamine, and 1,5-anhydroglucitol (1,5-AG) among individuals with diabetes, the CARDIA Study 2005-2006

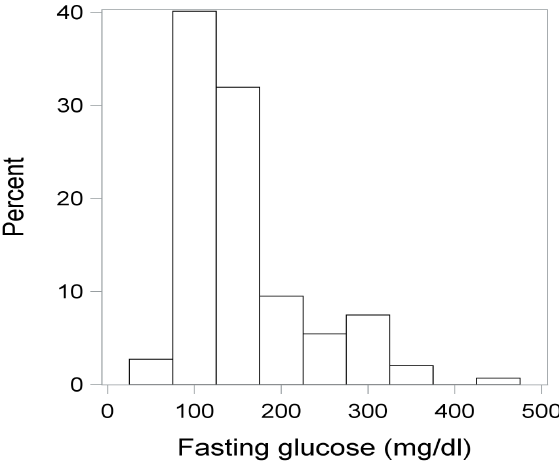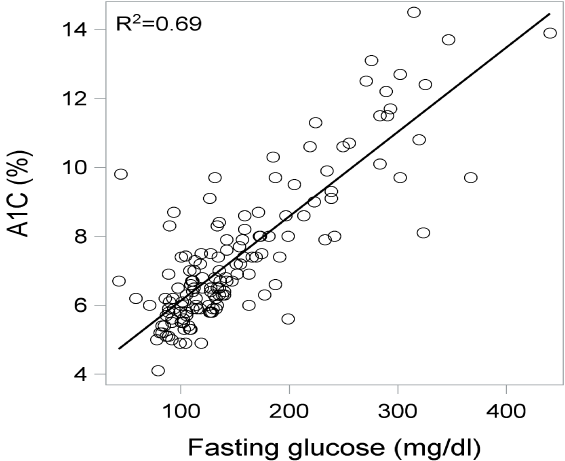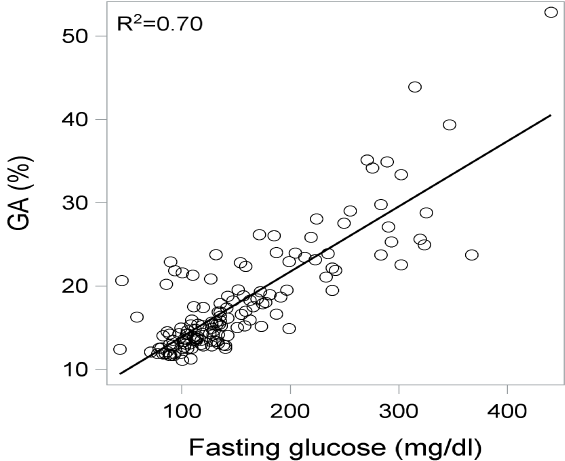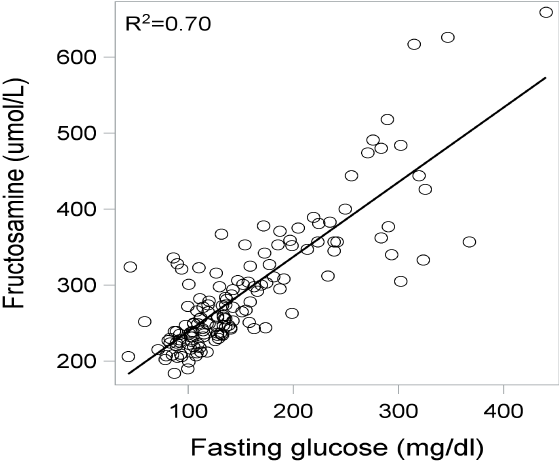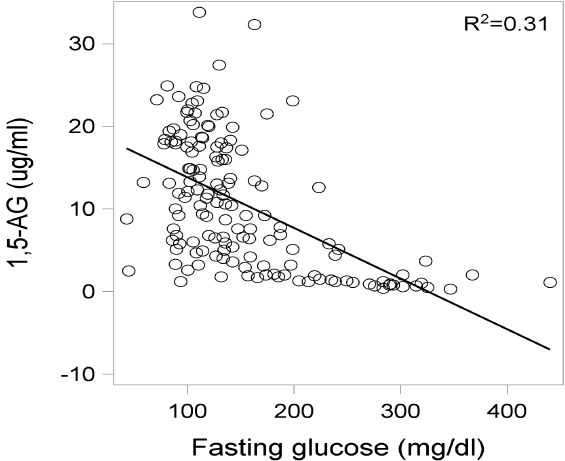

Table S3. Histogram of A1c and scatterplots of A1c with fasting glucose, glycated albumin (GA), fructosamine, and 1,5-anhydroglucitol (1,5-AG) among individuals with diabetes, the CARDIA Study 2005-2006

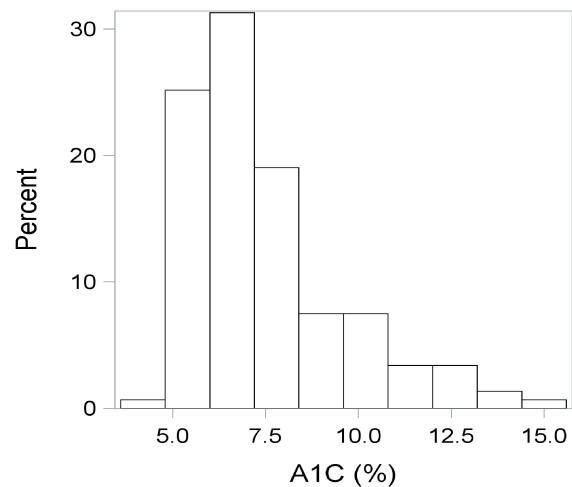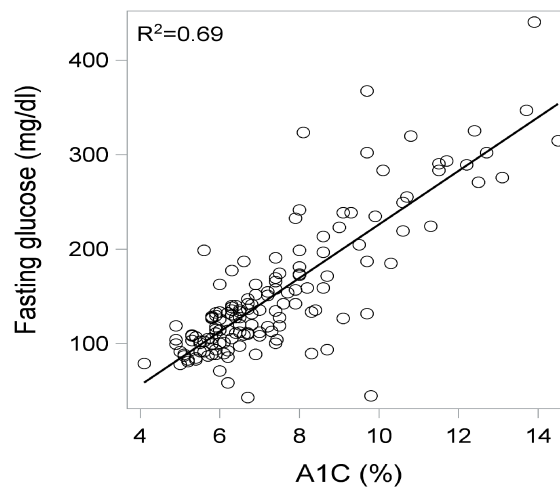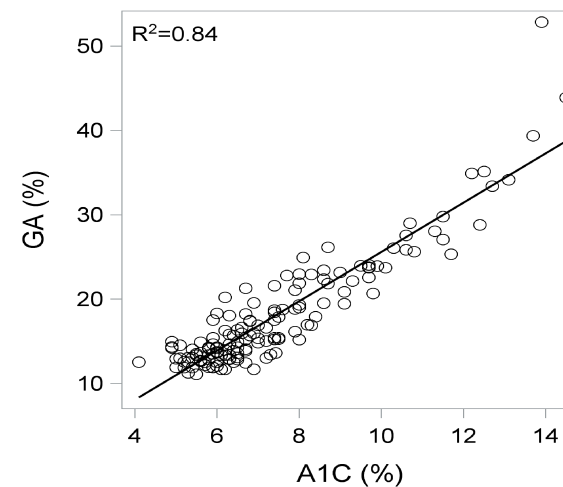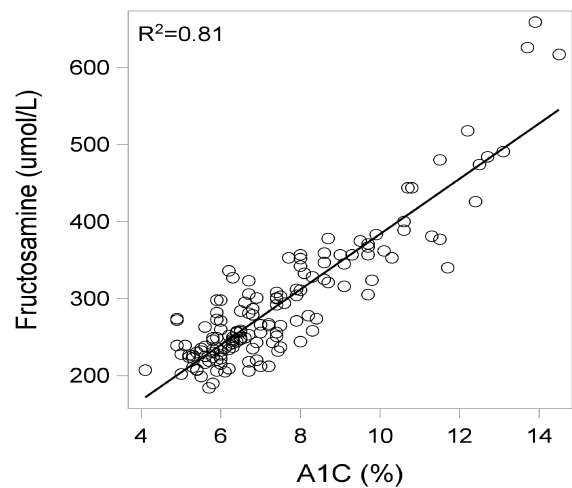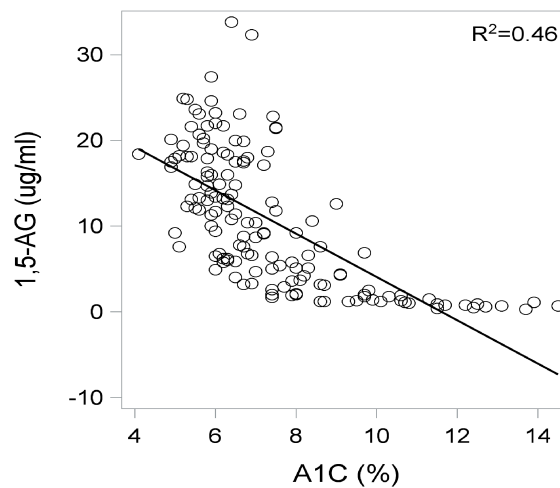

Table S4. Histogram of glycated albumin (GA) and scatterplots of GA with fasting glucose, A1c, fructosamine, and 1,5-anhydroglucitol (1,5-AG) among individuals with diabetes, the CARDIA Study 2005-2006

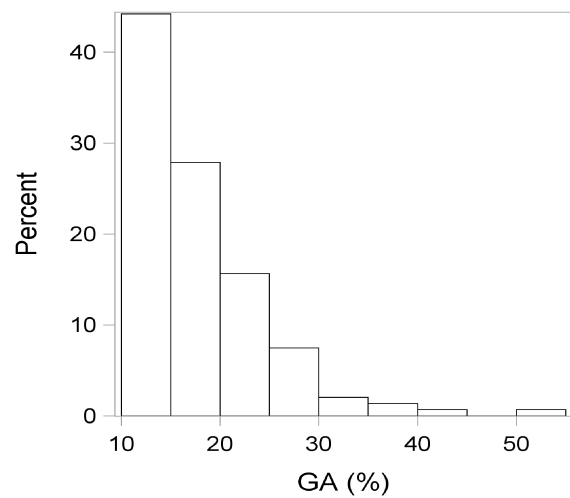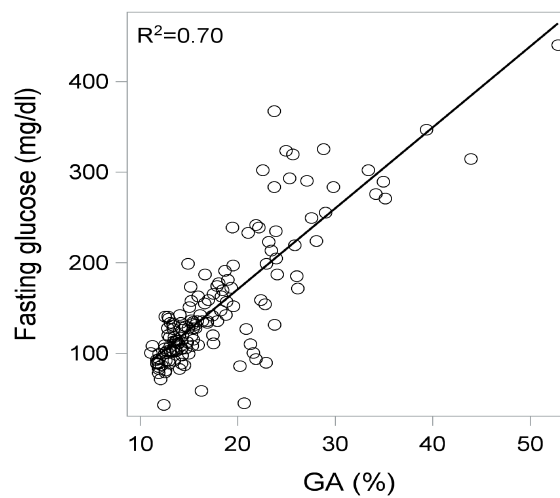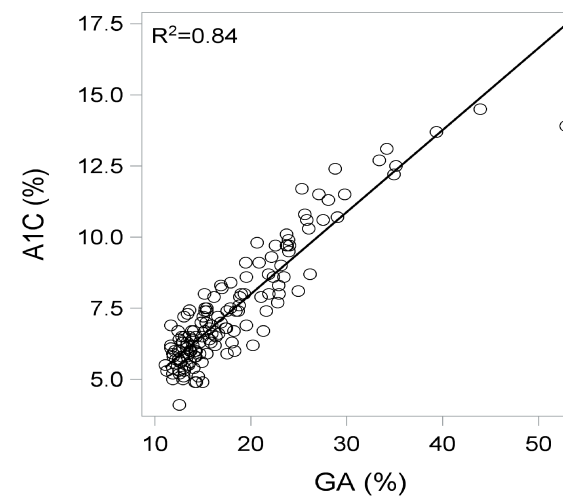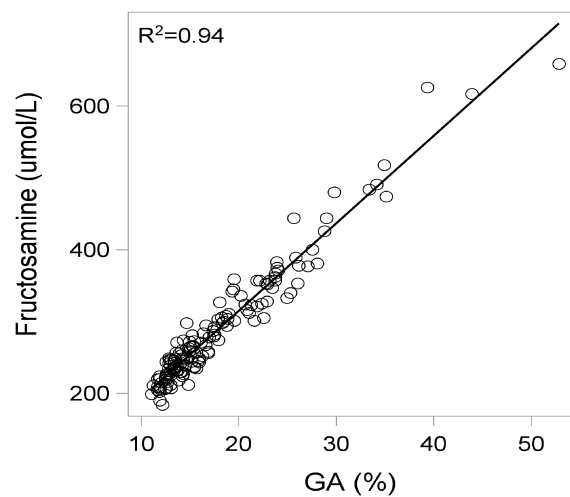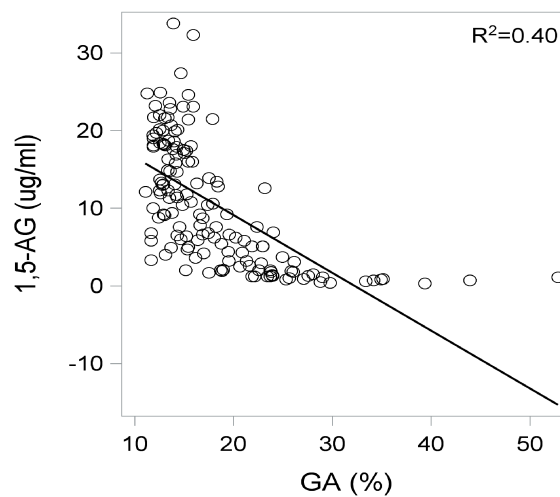

Table S5. Histogram of fructosamine and scatterplots of fructosamine with fasting glucose, A1c, glycated albumin (GA), and 1,5-anhydroglucitol (1,5-AG) among individuals with diabetes, the CARDIA Study 2005-2006

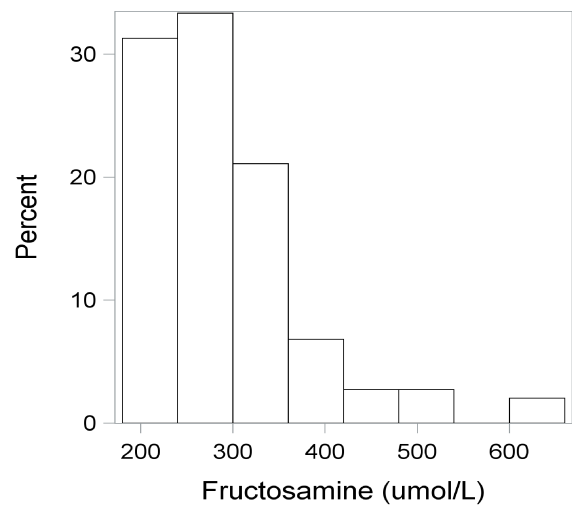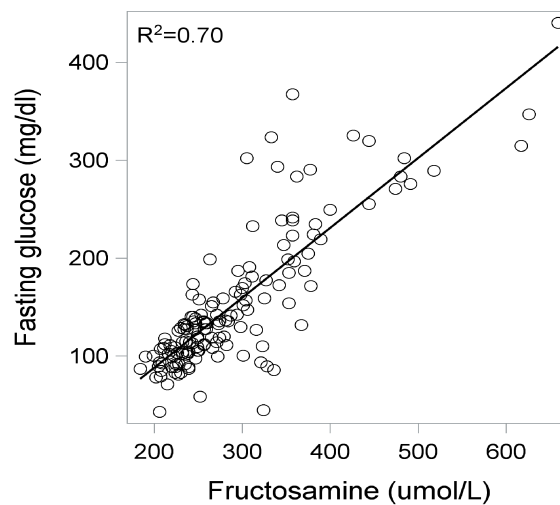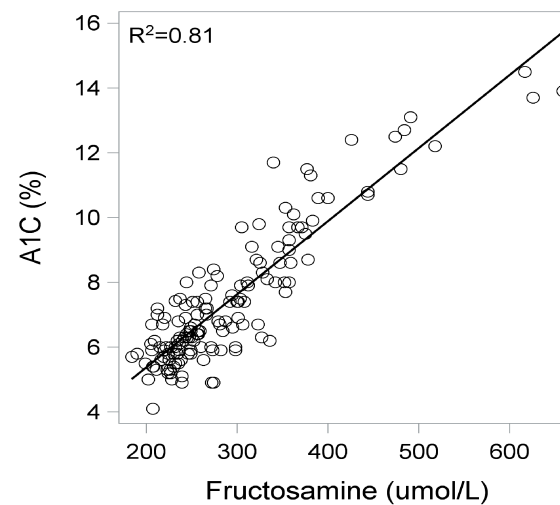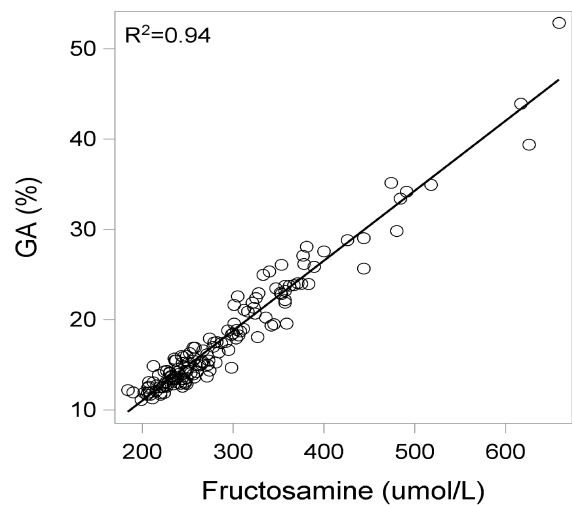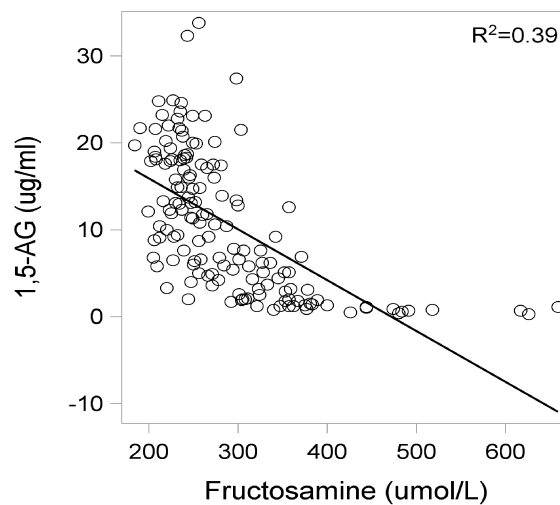

Table S6. Histogram of 1,5-anhydroglucitol (1,5-AG) and scatterplots of 1,5-AG with fasting glucose, A1c, glycated albumin (GA), and fructosamine among individuals with diabetes, the CARDIA Study 2005-2006

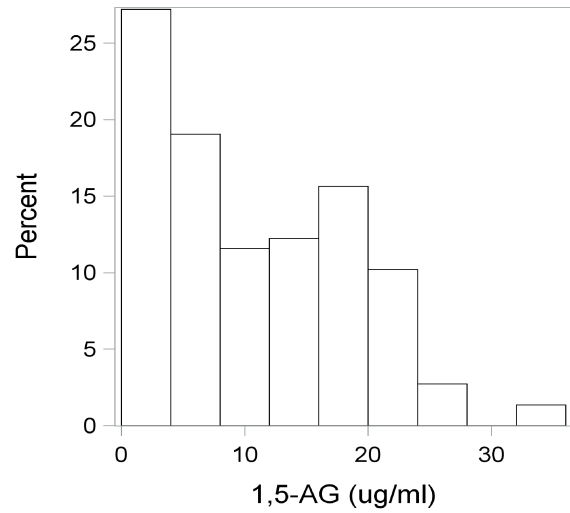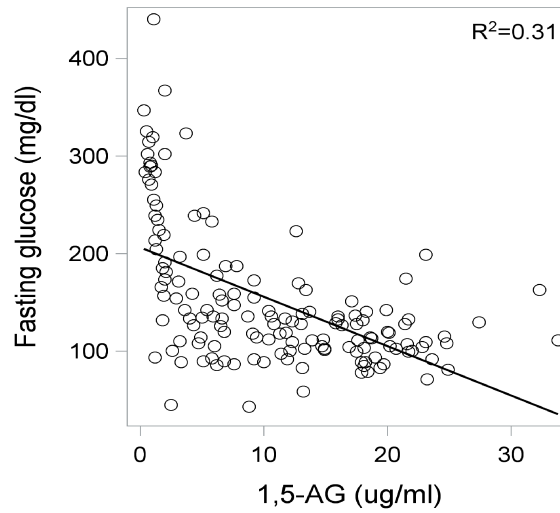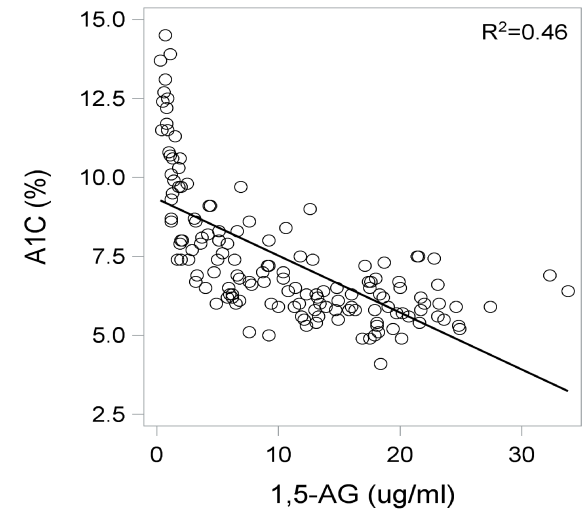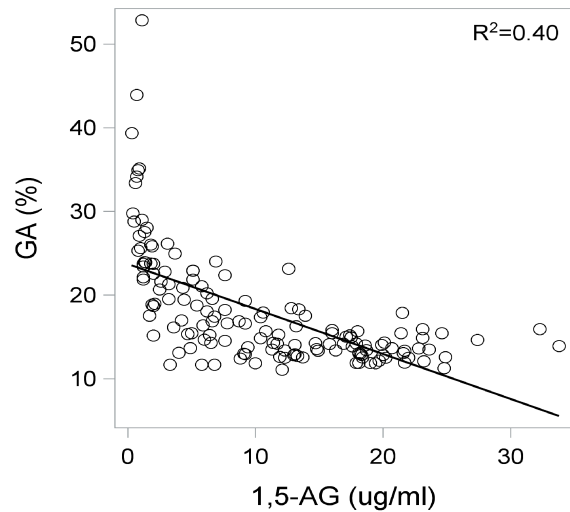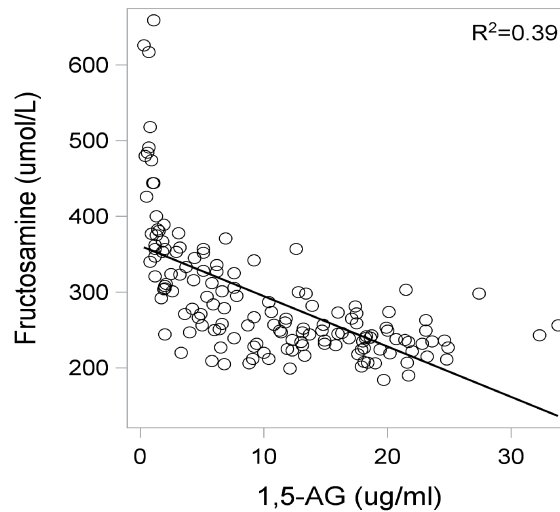

Table S7. Histogram of fasting glucose and scatterplots of fasting glucose with A1c, glycated albumin (GA), fructosamine, 1,5-anhydroglucitol (1,5-AG) and 2-hour glucose among individuals without diabetes, the CARDIA Study 2005-2006

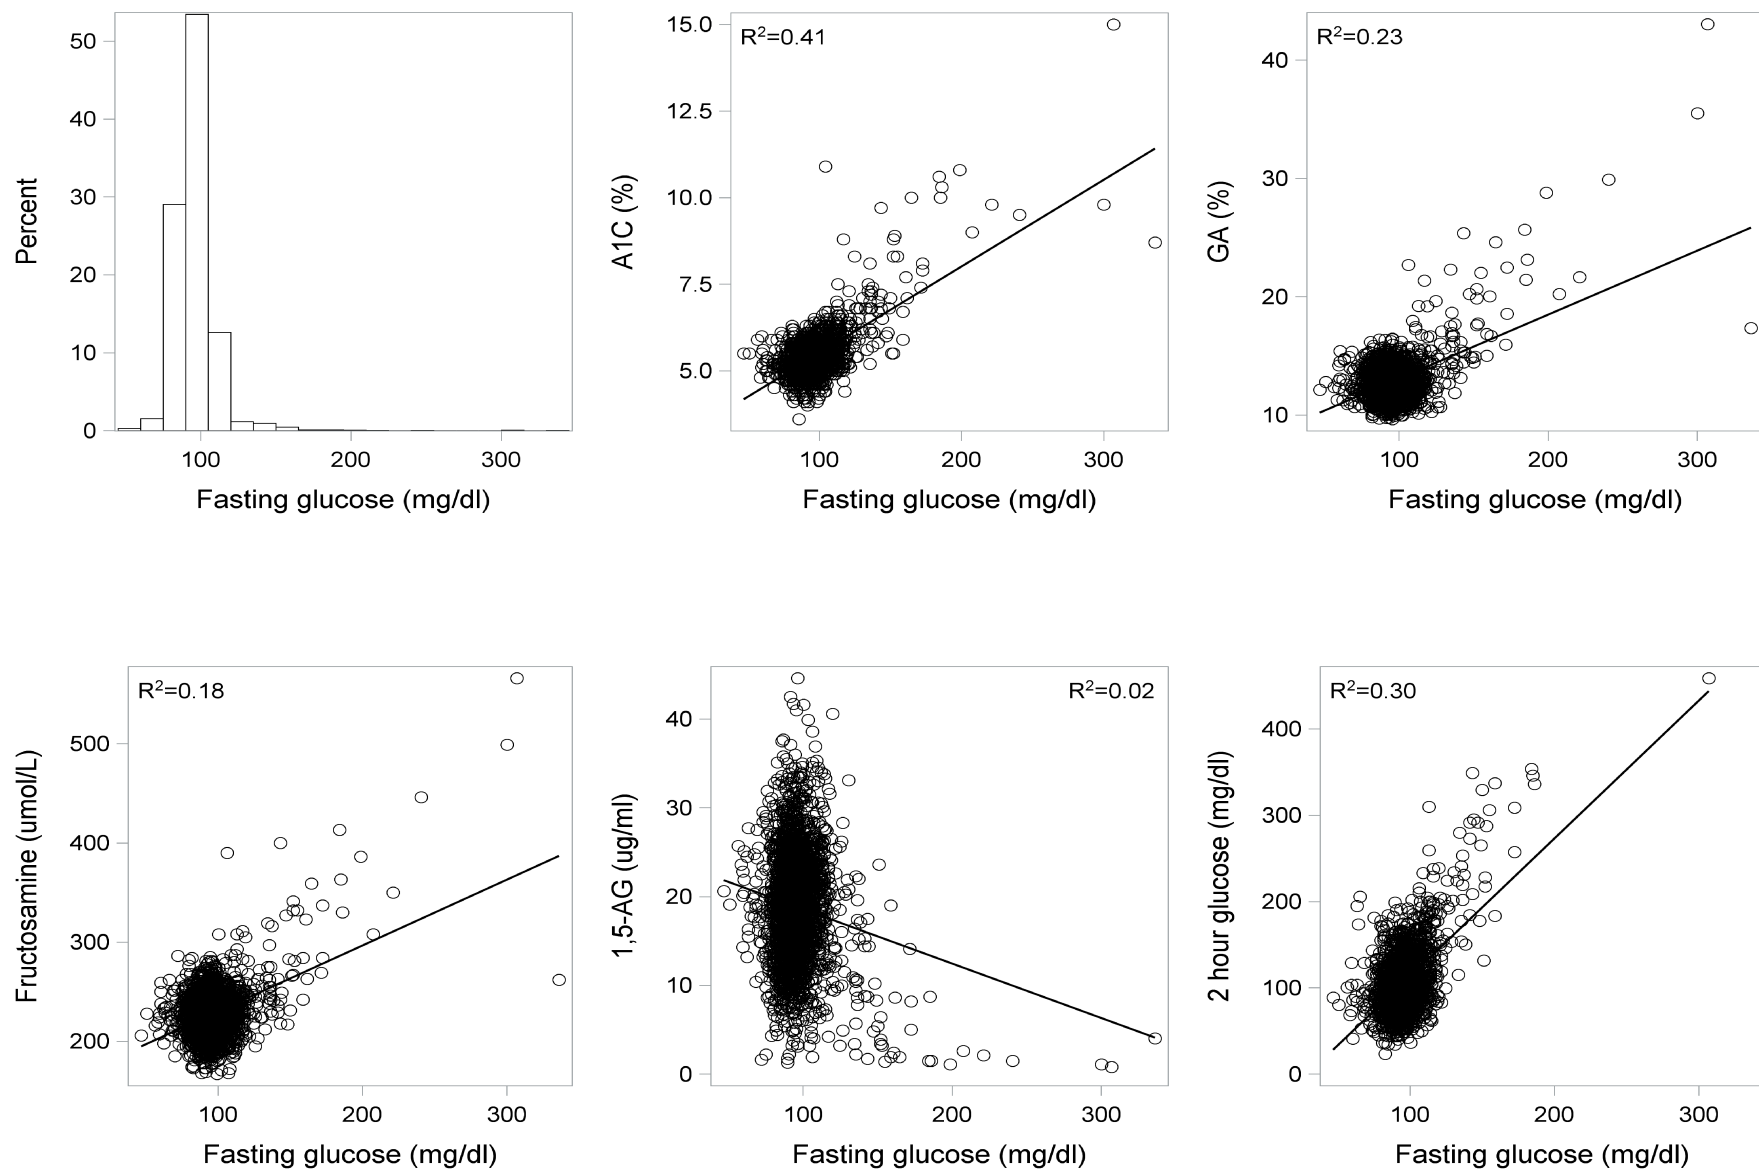



Table S8. Histogram of A1c and scatterplots of A1c with fasting glucose, glycated albumin (GA), fructosamine, 1,5-anhydroglucitol (1,5-AG) and 2-hour glucose among individuals without diabetes, the CARDIA Study 2005-2006

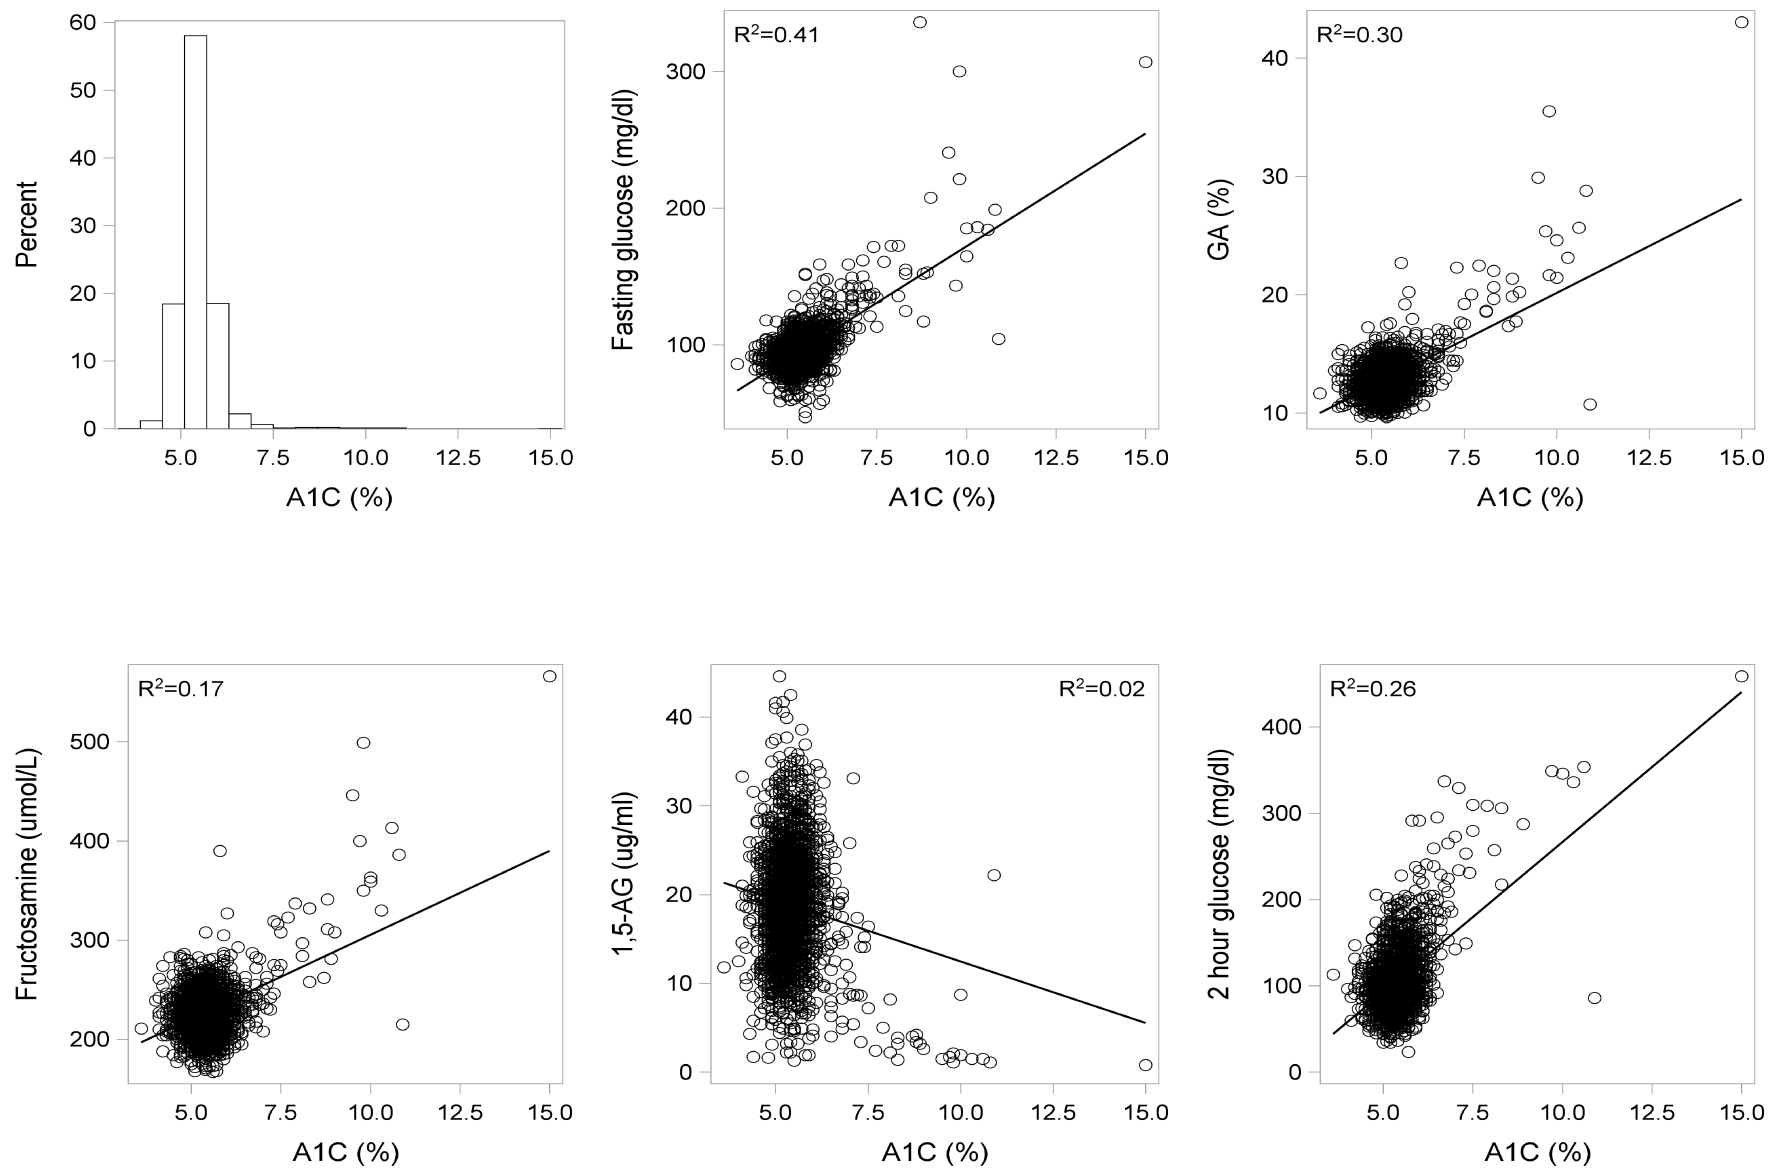

Table S9. Histogram of glycated albumin (GA) and scatterplots of GA with fasting glucose, A1c, fructosamine, 1,5-anhydroglucitol (1,5-AG) and 2-hour glucose among individuals without diabetes, the CARDIA Study 2005-2006

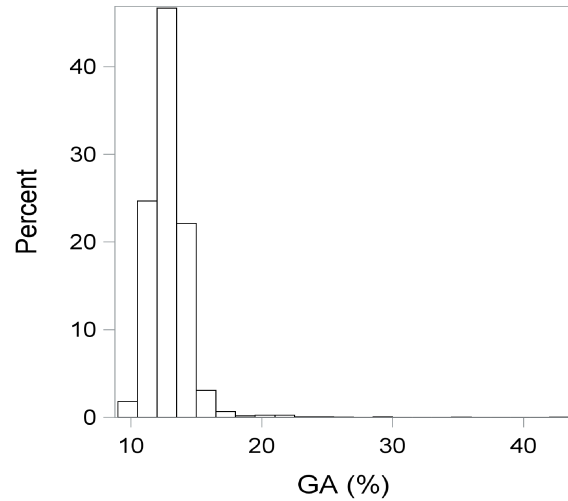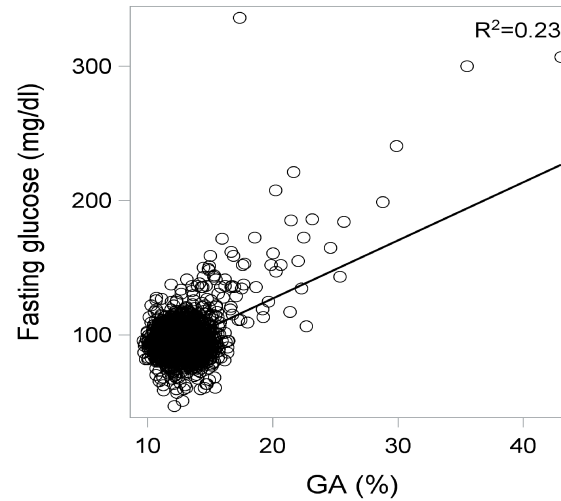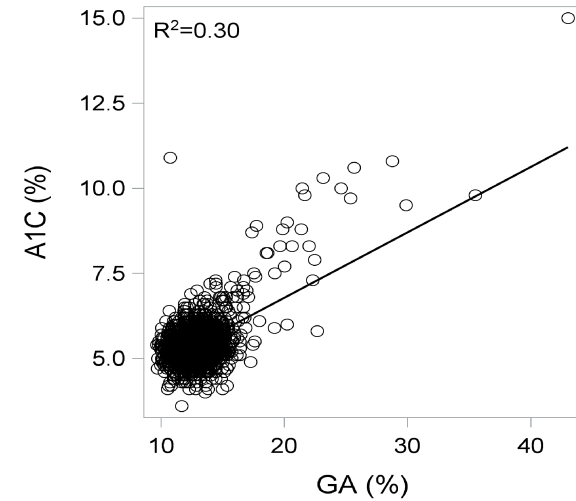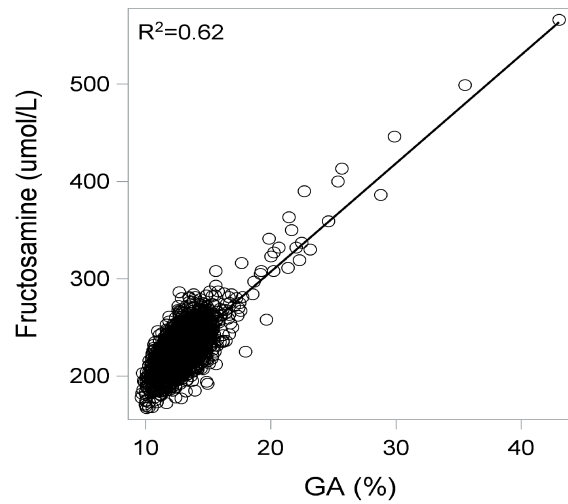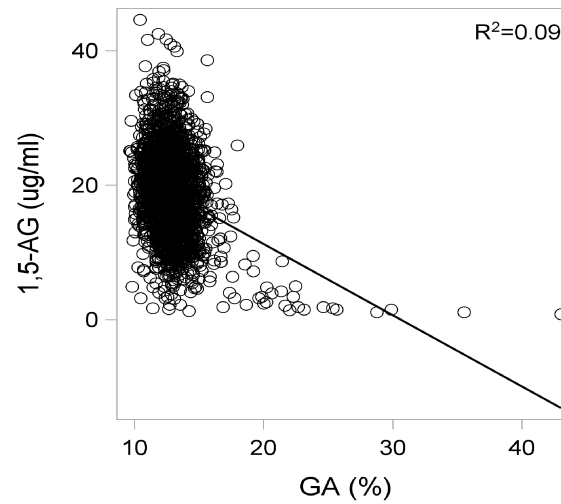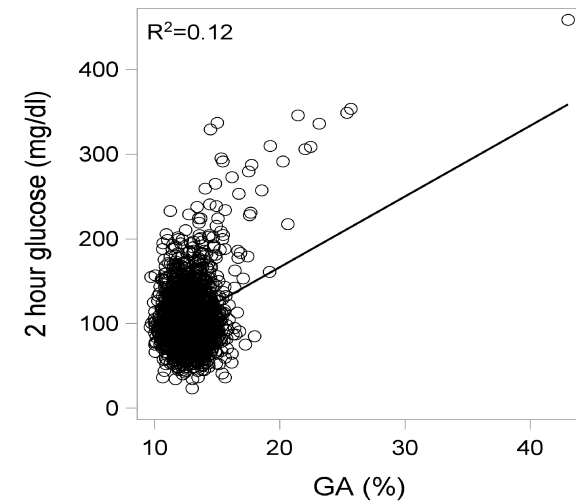

Table S10. Histogram of fructosamine and scatterplots of fructosamine with fasting glucose, A1c, glycated albumin (GA), 1,5-anhydroglucitol (1,5-AG) and 2-hour glucose among individuals without diabetes, the CARDIA Study 2005-2006

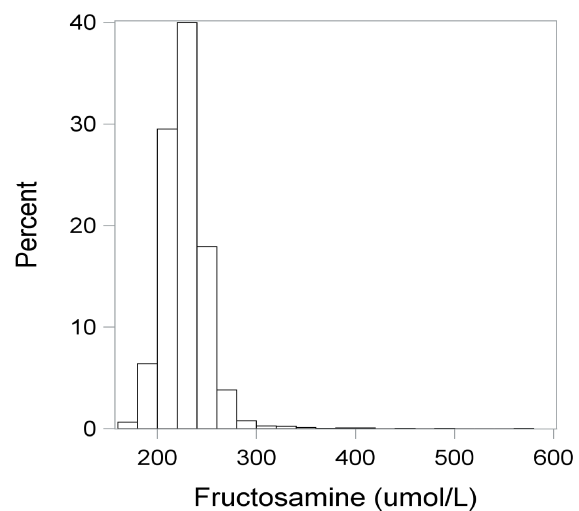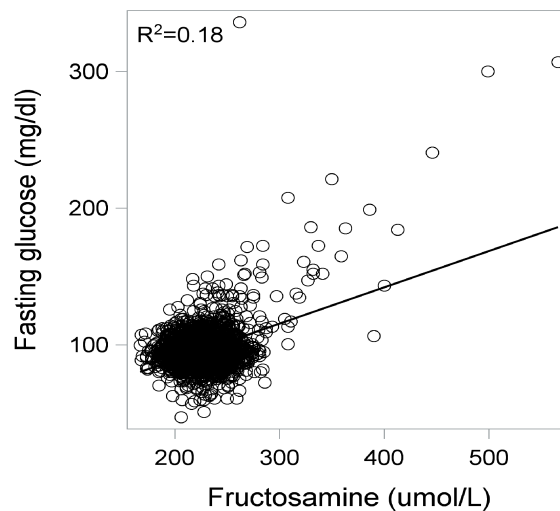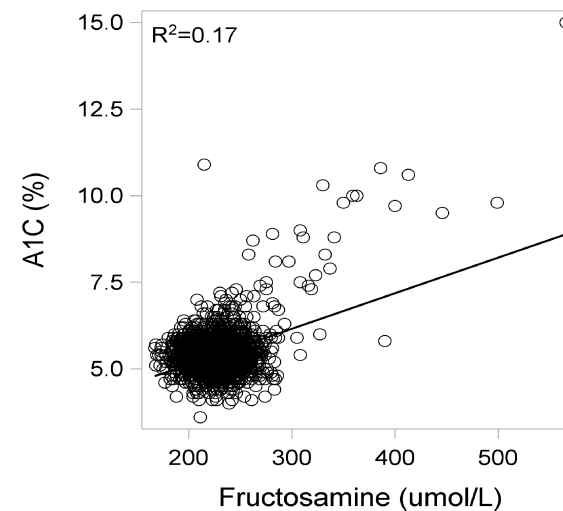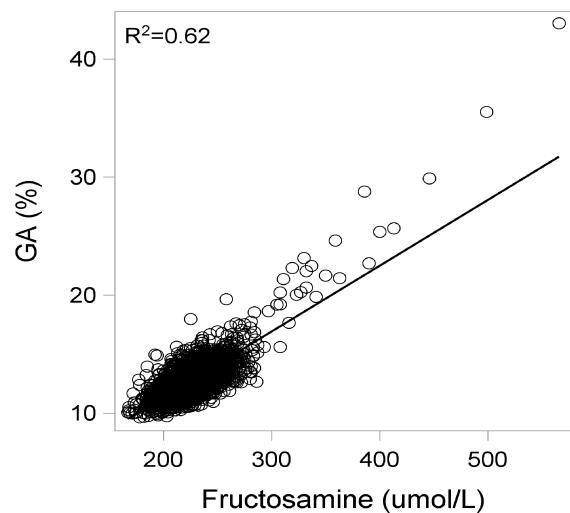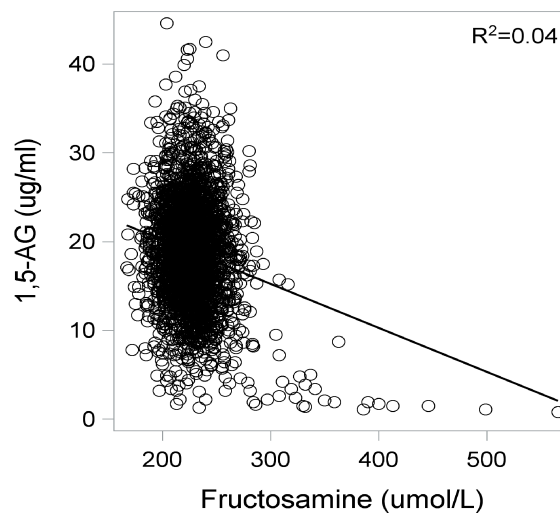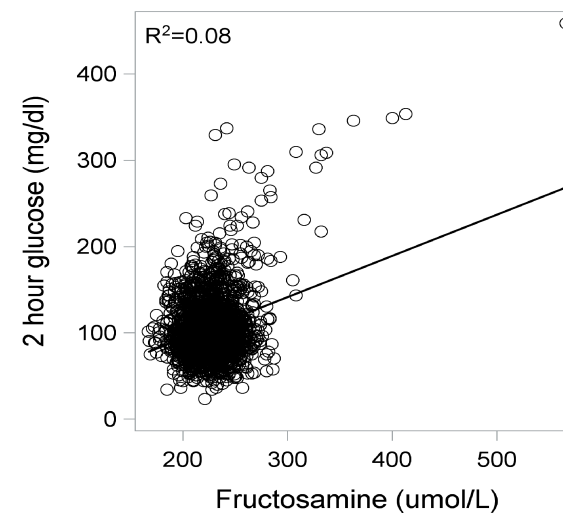

Table S11. Histogram of 1,5-anhydroglucitol (1,5-AG) and scatterplots of 1,5-AG with fasting glucose, A1c, glycated albumin (GA), fructosamine, and 2-hour glucose among individuals without diabetes, the CARDIA Study 2005-2006

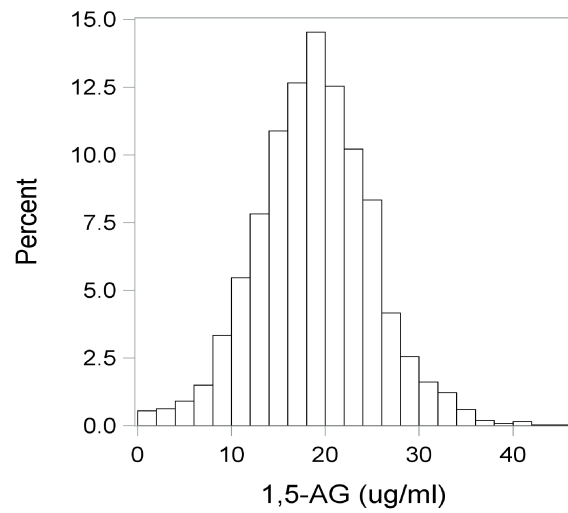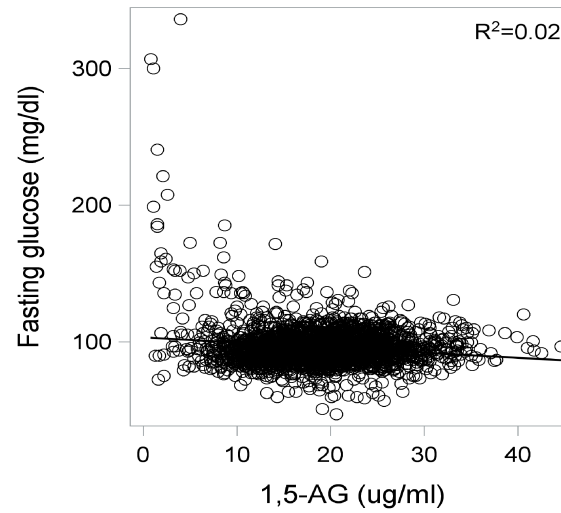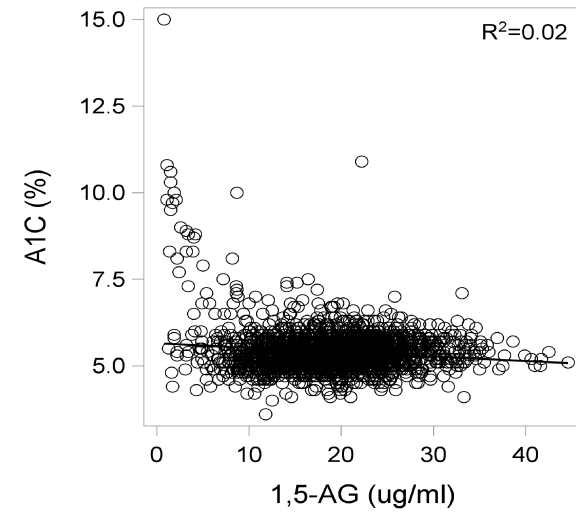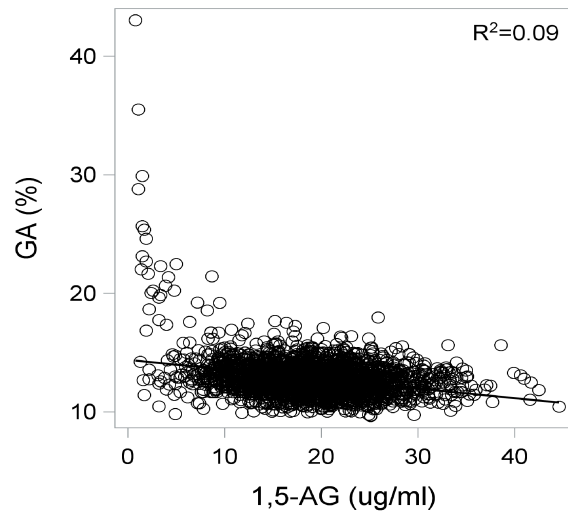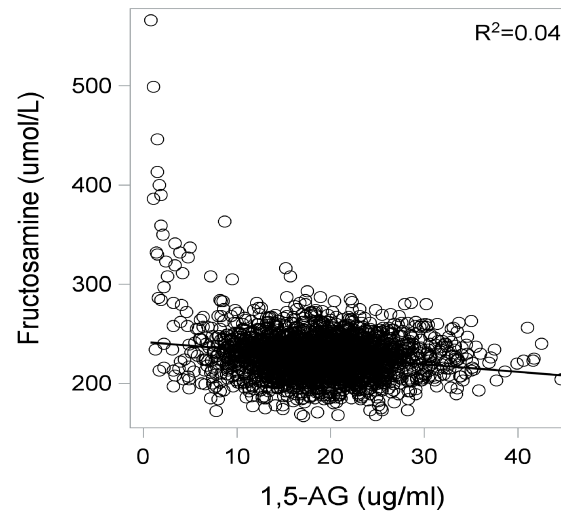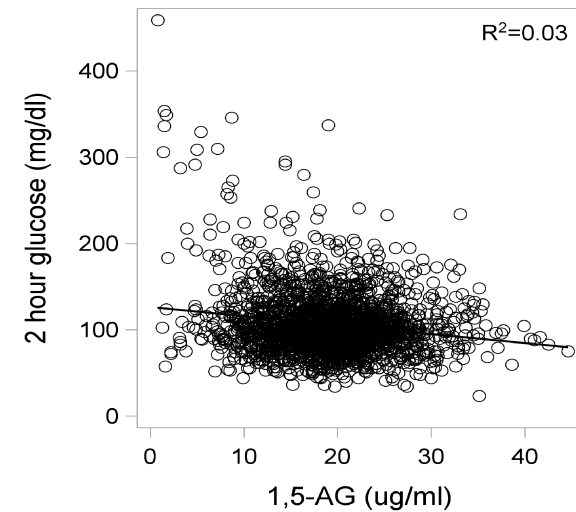

Table S12. Histogram of 2 hour glucose and scatterplots of 2 hour glucose with fasting glucose, A1c, glycated albumin (GA), fructosamine, and 1,5-anhydroglucitol (1,5-AG) among individuals without diabetes, the CARDIA Study 2005-2006

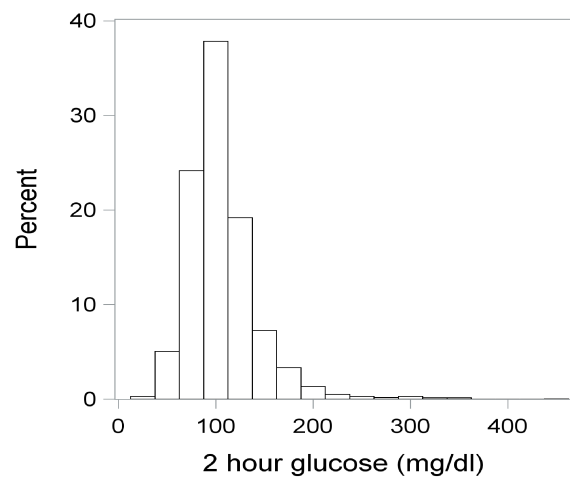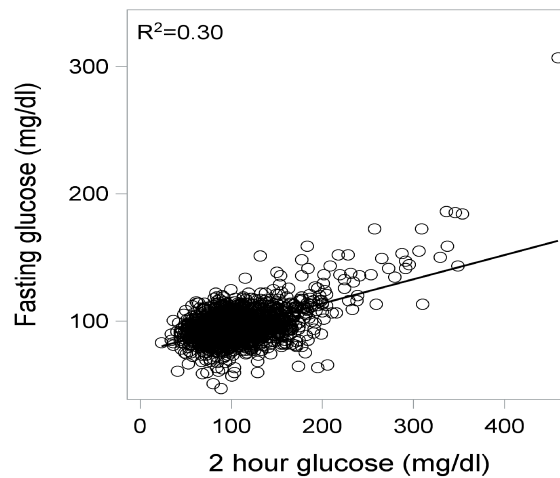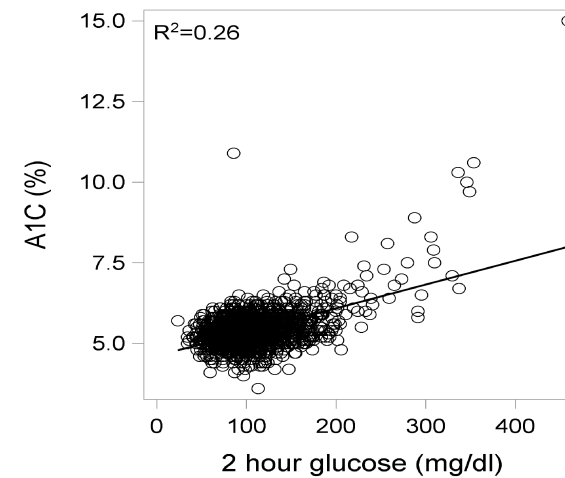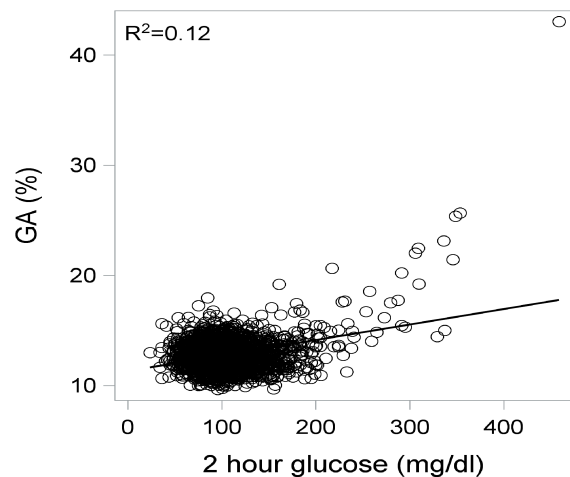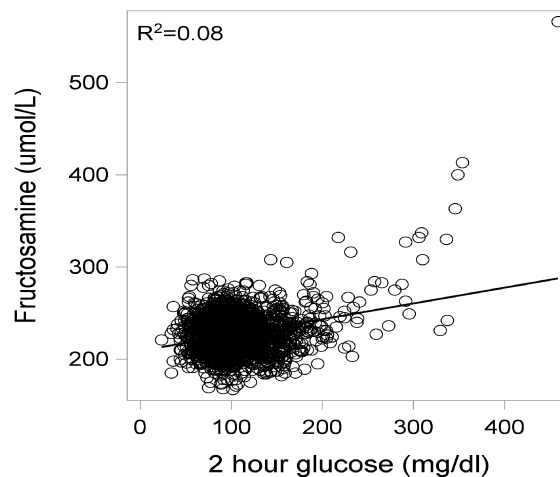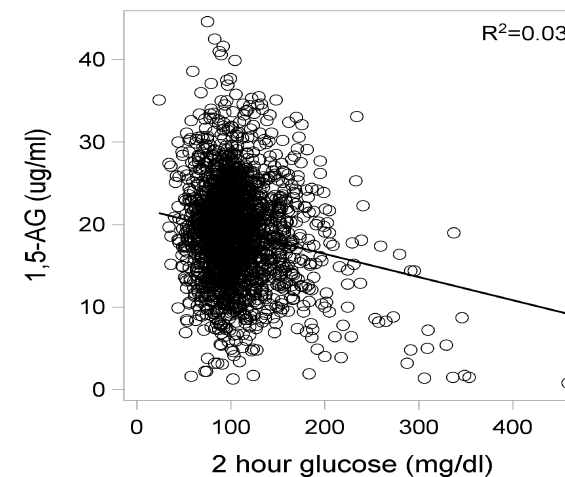

Supplement: bmjdrc-2016-000213supp.pdf [file bmjdrc-2016-000213supp.pdf]
